# Supplementary material
Source: PubMed Central journal article supplement (PMC3721502)

32. Risques RA, Lai LA, Brentnall TA, et al. Ulcerative colitis is a disease of accelerated colon aging: evidence from telomere attrition and DNA damage. *Gastroenterology*. 2008;135(2):410-418.

## Figure Legends

**Figure 1.** Cumulative incidence of relapse according to pre-treatment telomere length. Incidence of relapse per quartile. A greater rate of relapse was observed with each quartile as the telomere length shortened from the fourth to the first quartile.

**Figure 2.** Cumulative incidence of clonal evolution according to pre-treatment telomere length. (A) Incidence of clonal evolutions in the first quartile (shortest) compared to quartiles 2-4. (B) Incidence of monosomy 7 or complex cytogenetics in the first quartile (shortest) compared to quartiles 2-4.

**Figure 3.** Overall survival according to pre-treatment telomere length and absolute reticulocyte count (ARC). (A) Overall survival according to pre-treatment telomere length. A superior 6-year survival was observed in those in quartiles 2-4 compared to those in the first (shortest) quartile. (B) Overall survival according to pre-treatment telomere length and ARC. A favorable outcome was observed in patients with both a high ARC and longer telomeres (quartiles 2-4) compared to those with a low ARC and with the shortest telomeres (first quartile). An intermediate group with either a low ARC and longer telomere (quartiles 2-4) or a high ARC and with the shortest telomere length (first quartile) was observed. A high ARC was defined as  $\geq 25,000 /\mu\text{L}$  and a low ARC  $< 25,000 /\mu\text{L}$ .<sup>12</sup>

**eFigure 1.** Age distribution according to age-adjusted telomere length quartiles. The mean is depicted and the error bars represent one standard deviation.

Type of file: figure

Label: eFigure 1

Filename: eFigure 1\_JAMA10-2737R3.doc

Scheinberg, Cooper et al. "Association of telomere length of peripheral blood leukocytes with hematopoietic relapse, malignant transformation, and survival in severe aplastic anemia"

**eFigure 1.** Age distribution according to age-adjusted telomere length quartiles. The mean is depicted and the error bars represent one standard deviation.

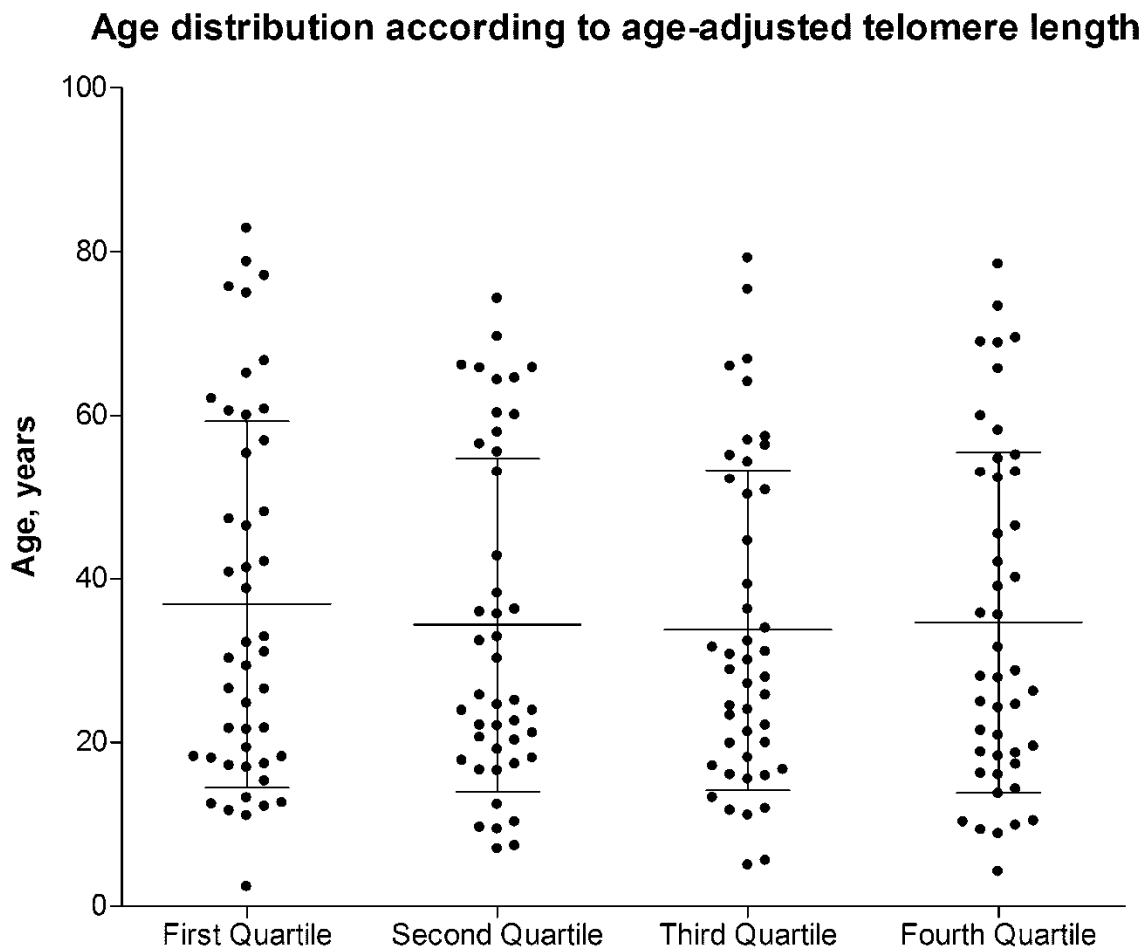

Supplement: NIHMS425056-supplement-supplement_1.pdf [file NIHMS425056-supplement-supplement_1.pdf]
